# Supplementary material for: A cassava common mosaic virus vector for virus-induced gene silencing in cassava
Source: PubMed Central journal article supplement (PMC8273954; doi:10.1186/s13007-021-00775-w), 2021-07-12
Supplement: 13007_2021_775_MOESM1_ESM.pdf [file 13007_2021_775_MOESM1_ESM.pdf]

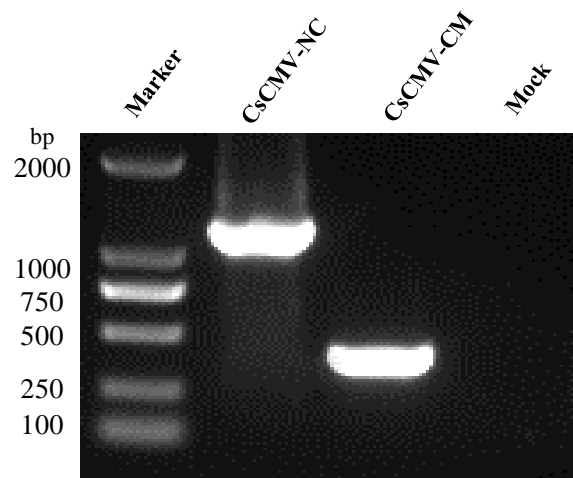

**Figure S1: Detection of viral RNA of the CsCMV-CM and CsCMV-NC in infected cassava leaves using RT-PCR**

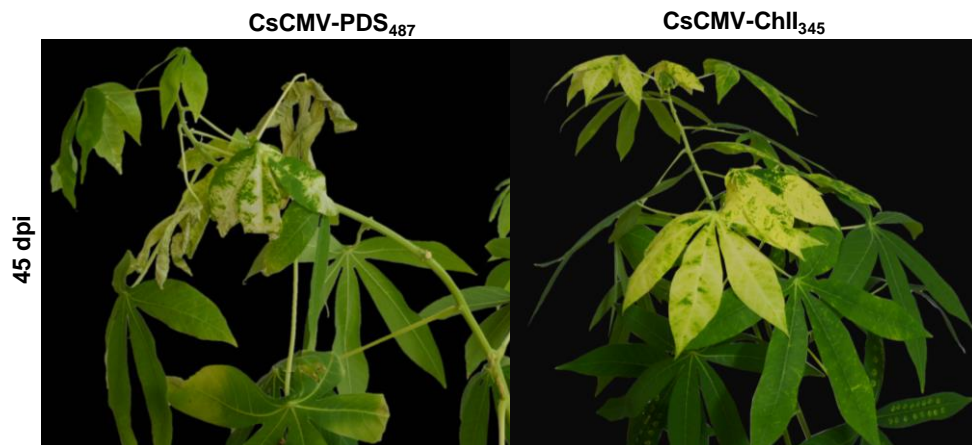

Figure S2: Silencing phenotypes in 5-month-old cassava plants induced by infection with pCsCMV-PDS<sub>487</sub> or pCsCMV-Chl<sub>345</sub> at 45 dpi.

**a**

|                          |     |                                                                    |      |
|--------------------------|-----|--------------------------------------------------------------------|------|
| Cassava <i>PDS</i>       | 206 | CTTTGCAGGTAGTTTGTGGACTATCCTAGACCTGACATTGATAACACGGTGAATTTCT         | 265  |
| <i>N.Benthamiana PDS</i> | 760 | CTTTAAAGGTAGTCTGCAT TGATTAT CCAAGAC CAGAGCT AGACAAT ACAGTT AACTATT | 819  |
| Cassava <i>PDS</i>       | 266 | TGGAAGCTGCATACTTATCAGCATCC TTCCGCAATTCTCC CCGTCCAGCTAAACATTGA      | 325  |
| <i>N.Benthamiana PDS</i> | 820 | TGGAGGCGGCGTTATTATCATCATGTTTCGTACTTCTCCACGCCAACTAAACATTGG          | 879  |
| Cassava <i>PDS</i>       | 326 | AAGTTGTGATTGCTGGGGCAGGGTTGGCTGTTTATCAACTGCGAAAATTTTGGCAGATG        | 385  |
| <i>N.Benthamiana PDS</i> | 880 | AGATTGTTATTGCTGGTGCAGGTTTGGGTGTTTGTCTACAGCAAAATATCTGGCAGATG        | 939  |
| Cassava <i>PDS</i>       | 386 | CAGGGCAACAGCCCGTACTACTTGAGGCAAGAGAGTCTGGGTGGAAGGTGGCTGCGT          | 445  |
| <i>N.Benthamiana PDS</i> | 940 | CTGGTCAAAAACC GATATT GCTGGAGCAAGAGATGCTCTAGSTGGGAA----GCTGCAT      | 995  |
| Cassava <i>PDS</i>       | 446 | GGAAAGATGATGATGGGGACTGGTATGAAACAGGCTTGCA                           | 485  |
| <i>N.Benthamiana PDS</i> | 996 | GGAAAGATGATGATGGAGATTGGTACGAGACTGGGTGCA                            | 1035 |

**Identity%=75.71**

**b**

|                           |      |                                                                 |      |
|---------------------------|------|-----------------------------------------------------------------|------|
| Cassava <i>Chll</i>       | 1    | GCATCTTAAACAGTTCCTACTTGTGCATGCATTCCAAATCTATCAAGTAGCTGTGGCCTG    | 60   |
| <i>N.Benthamiana Chll</i> | 1908 | GCATCTCTACGGTCCCACCTTGGGCATGCATTCCAAATCGATCAAGAAAGTTGTGGCCTA    | 1849 |
| Cassava <i>Chll</i>       | 61   | AGTCC CCTTCTT CAGGGT TGCCAGAGCCAATCAAATGAACCGTGCAGGATGTGAAATA   | 120  |
| <i>N.Benthamiana Chll</i> | 1848 | AGTTCTCCTTCTT CAGGAT TACCCGAACCAATAAGGATAAATCGGGCAGGGTGTGATATT  | 1789 |
| Cassava <i>Chll</i>       | 121  | GAAATACCCCTCTCTCCAAGTGTCCATCCTGAGGCAAGCAGAAATCAATAGAACATCC      | 180  |
| <i>N.Benthamiana Chll</i> | 1788 | GATATC CCCTCTCTTCAACAGTGTCCATCCC GATGCTG CAGAATC CAAAAGAACATCT  | 1729 |
| Cassava <i>Chll</i>       | 181  | ACTAAGTGGTCATCTAAAAGGTTAACTTCATCCACATAAAGAAATCCCCTATTAGCTTTA    | 240  |
| <i>N.Benthamiana Chll</i> | 1728 | ACTAAA TGGTCGT CCAAAA GATTAACCTCATCGACATAAAGAAATCCCCTGTTAGCTTTA | 1669 |
| Cassava <i>Chll</i>       | 241  | GCAAGAAGGCCAGGCTCAAATGCCTTGACACCTTCCGTGAGAGCCTTTTCAATATCAATT    | 300  |
| <i>N.Benthamiana Chll</i> | 1668 | GCAAGAAGACCAGGCTCGAAAGCCTT CACACCC TCAGTAA GAGCTTTCTCAATGTCGATT | 1609 |
| Cassava <i>Chll</i>       | 301  | GTACCAAAAACCTATCCTCTGTAGCACCTAATGGCAATCAACC                     | 345  |
| <i>N.Benthamiana Chll</i> | 1608 | GTGCCACACACCTGTCTCTCAGTAGCACCTAGCGGTAATCAACC                    | 1564 |

**Identity%=82.61**

**Figure S3: Alignment of the cassava 487-bp *PDS* (GenBank accession: XM\_021757403) and 345-bp *Chll* gene fragments (GenBank accession: XM\_021743433) in pCsCMV-PDS<sub>487</sub> and pCsCMV-Chll<sub>345</sub> with the *N. benthamiana PDS* (GenBank accession: DQ469932) and *Chll* (Sequence ID: Niben101Scf16898g00001.1) homologues by the Sol Genomics Network (SGN). ([https://solgenomics.net/organism/Nicotiana\\_benthamiana/genome](https://solgenomics.net/organism/Nicotiana_benthamiana/genome)).**

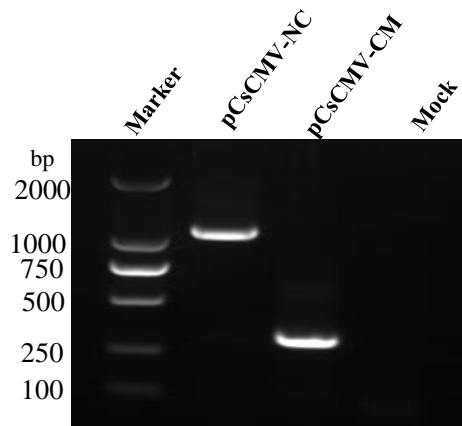

**Figure S4 :Detection of viral RNA of the CsCMV-CM and CsCMV-NC in cassava storage roots using RT-PCR.**
