# Supplementary material for: A cassava common mosaic virus vector for virus-induced gene silencing in cassava
Source: PubMed Central journal article supplement (PMC8273954; doi:10.1186/s13007-021-00775-w), 2021-07-12
Supplement: 13007_2021_775_MOESM2_ESM.pdf [file 13007_2021_775_MOESM2_ESM.pdf]

**Table S1.** Primers used in identification of the complete genome sequence of the CsCMV-CM

| Primer     | Sequence (5'-3')           | Application          |
|------------|----------------------------|----------------------|
| CsCMV5F    | GGAAAACCTCACATTCCAAACCAAAC | Full-length cDNAs of |
| CsCMV3R    | ATACCGCTAAACTGTCCGCGGG     | CsCMV                |
| CsCMV448R  | GTTGATGAAGTGGTCACGGTGTTG   | 5'RACE               |
| CsCMV5259F | GGACCAAGACTGTTTACTATG      | 3'RACE               |

**Table S2.** Primers used in construction of agroinfectious clone pCsCMV-CM and pCsCMV-NC vector

| Primer         | Sequence (5'-3')                                                   | Application   |
|----------------|--------------------------------------------------------------------|---------------|
| CsCMV-5Fov     | <u>AGGAAGTTCATTTCATTGGAGAGGGGAAAACCTCACATTCCAAACCAAAC</u>          | pCsCMV-CM     |
| CsCMV30T-R     | <u>CGATTTTTTTTTTTTTTTTTTTTTTTTTTTTTTAT</u> ACCGCTAAACTGTCCGCGGG    | pCsCMV-CM     |
| CsCMVpGr-F     | <u>TATAAAAAAAAAAAAAAAAAAAAAAAAAAAAAATCGGTACGCTGAAATCACCAGTCT</u>   | pCsCMV-CM     |
| pGr35S-R       | <u>CCTCTCCAAATGAAATGAACTTCCT</u>                                   | pCsCMV-CM     |
| CsCMV-5Fov     | <u>AGGAAGTTCATTTCATTGGAGAGGGGAAAACCTCACATTCCAAACCAAAC</u>          | pCsCMV-NC     |
| NC-CsCMV5623-R | <u>AGGACTGGACAGAGACCAC</u> IGTGTAGGAGTGGTTGAGGTGGGGTGGCCCTAGCTAATT | (fragment I)  |
| NC-CsCMV5534-F | <u>ACTTGTGGTCTGCTGAGACCAAGAGATTTGGCAAACCTCCATCC</u>                | pCsCMV-NC     |
| pGr35S-R       | <u>CCTCTCCAAATGAAATGAACTTCCT</u>                                   | (fragment II) |
| NC-F           | <u>CAGTGGTCTCTGTCCAGTCCT</u>                                       | pCsCMV-NC     |
| NC-R           | <u>TGGTCTCAGCAGACCACAAGT</u>                                       | (fragment NC) |

Underlined sequences corresponding to the overlapping region used Gibson Assembly.

**Table S3.** Primers used for Nimble Cloning of gene fragments into the pCsCMV-NC vector.

| Gene                  | GenBank<br>Accession<br>number | Size<br>(bp)                                             | Position | Primer sequence (5'-3')                               |
|-----------------------|--------------------------------|----------------------------------------------------------|----------|-------------------------------------------------------|
| <i>PDS</i> (Cassava)  | XM_021757403                   | 487                                                      | 293-779  | <u>AGTGGTCTCTGTCCAGTCCT</u> TATGCAAGCCTGTTTCATACCAGTC |
|                       |                                |                                                          |          | GGTCTCAGCAGACCACAAGTACTTTGTACGGGAGTGTTTCTGCAT         |
| <i>ChlI</i> (Cassava) | XM_021743433                   | 439                                                      | 545-983  | <u>AGTGGTCTCTGTCCAGTCCT</u> GCATCTTTAACAGTTCCTACTTGTG |
|                       |                                |                                                          |          | GGTCTCAGCAGACCACAAGT <u>CAGATCCAGAAGATCCAGAATCCA</u>  |
|                       |                                | 345                                                      | 639-983  | <u>AGTGGTCTCTGTCCAGTCCT</u> GCATCTTTAACAGTTCCTACTTGTG |
|                       |                                |                                                          |          | GGTCTCAGCAGACCACAAGTGGTTGATTTGCCATTAGGTGCTAC          |
| 236                   | 748-983                        | <u>AGTGGTCTCTGTCCAGTCCT</u> GCATCTTTAACAGTTCCTACTTGTG    |          |                                                       |
|                       |                                | GGTCTCAGCAGACCACAAGT <u>GCTAATAGAGGGATTCTTTATGTGGATG</u> |          |                                                       |
| 133                   | 851-983                        | <u>AGTGGTCTCTGTCCAGTCCT</u> GCATCTTTAACAGTTCCTACTTGTG    |          |                                                       |
|                       |                                | GGTCTCAGCAGACCACAAGT <u>GAGAGGGTATTTCTATTTACATCCTGC</u>  |          |                                                       |

Underlined sequences corresponding to the adapter 1 and 2 of Nimble Cloning

**Table S4.** Primers used for quantitative RT-PCR analyses

| Gene                                          | GenBank Accession number/ Sequence ID | Primer sequence (5'-3')                           |
|-----------------------------------------------|---------------------------------------|---------------------------------------------------|
| <i>PDS</i> (Cassava)                          | XM_021757403                          | GTTTGCTACTCCAGTTGACATC<br>AGTTTCCTGTCTGAACCATATGT |
| <i>Chll</i> (Cassava)                         | XM_021743433                          | GCTGAGCTGAATGTGGATGG<br>GGGATAACAGTAGCAACGTCCT    |
| <i>Mepp2A</i> (Cassava)                       | Manes.09G039900                       | TGCAAGGCTCACACTTTCATC<br>CTGAGCGTAAAGCAGGGAAG     |
| <i>PDS</i> ( <i>Nicotiana benthamiana</i> )   | DQ469932                              | CTTATGTTGAAGCTCAAGACGG<br>AATATGTTCCACAATCGGCATG  |
| <i>Chll</i> ( <i>Nicotiana benthamiana</i> )  | Niben101Scf16898g00001.1              | GCAGAGTCAAGGGAGGAAGT<br>TGGCTCTCCTCAGCAAGTTT      |
| <i>Actin</i> ( <i>Nicotiana benthamiana</i> ) | AY179605                              | GGCATTGATGAAACCACATACA<br>AGGACAATGTTTCCGTACAGAT  |
| <i>CP</i> (CsCMV)                             | MW175326                              | GCCCTAGACCTGGTCAACTT<br>AGCAGGAGGTATGTTGGCTT      |
